# Supplementary material
Source: PubMed Central journal article supplement (PMC3042680)
Supplement: NIHMS34232-supplement-Table_S1.pdf [file NIHMS34232-supplement-Table_S1.pdf]

| SCC ID | Chromosome | Type | start      | end       | differentiation status | Previously published in Purdie <i>et al</i> 2007 |
|--------|------------|------|------------|-----------|------------------------|--------------------------------------------------|
| 1      | 1          | G    | 77164593   | 173717231 | P                      | Yes                                              |
| 1      | 1          | L    | 173717231  | 1qter     | P                      | Yes                                              |
| 1      | 2          | L    | 2qcen      | 2qter     | P                      | Yes                                              |
| 1      | 5          | G    | 5pter      | 5qter     | P                      | Yes                                              |
| 1      | 6          | G    | 6pter      | 6qter     | P                      | Yes                                              |
| 1      | 7          | L    | 135204272  | 7qter     | P                      | Yes                                              |
| 1      | 9          | L    | 9qcen      | 122991506 | P                      | Yes                                              |
| 1      | 9          | G    | 122991506  | 9qter     | P                      | Yes                                              |
| 1      | 10         | L    | 10pter     | 10qter    | P                      | Yes                                              |
| 1      | 11         | L    | 83013412   | 11qter    | P                      | Yes                                              |
| 1      | 13         | U    | 13qcen     | 13qter    | P                      | Yes                                              |
| 1      | 14         | G    | 52302098   | 14qter    | P                      | Yes                                              |
| 1      | 15         | L    | 15qcen     | 15qter    | P                      | Yes                                              |
| 1      | 17         | U    | 17pter     | 17qter    | P                      | Yes                                              |
| 1      | 20         | G    | 20qcen     | 20qter    | P                      | Yes                                              |
| 1      | 22         | L    | 22qcen     | 22qter    | P                      | Yes                                              |
| 1      | X          | G    | Xpter      | 32262635  | P                      | Yes                                              |
| 1      | X          | G    | 68899351   | 87984705  | P                      | Yes                                              |
| 2      | 3          | L    | 3pter      | 3pcen     | W                      | Yes                                              |
| 2      | 3          | G    | 3qcen      | 3qter     | W                      | Yes                                              |
| 2      | 9          | L    | 9pter      | 38017644  | W                      | Yes                                              |
| 2      | 9          | G    | 9qcen      | 9qter     | W                      | Yes                                              |
| 2      | 18         | G    | 18pter     | 18pcen    | W                      | Yes                                              |
| 2      | 18         | L    | 18qcen     | 18qter    | W                      | Yes                                              |
| 3      | 3          | L    | 3pter      | 87137751  | M                      | Yes                                              |
| 3      | 3          | G    | 132942030  | 3qter     | M                      | Yes                                              |
| 3      | 5          | G    | 5pter      | 5pcen     | M                      | Yes                                              |
| 3      | 5          | L    | 5qcen      | 5qter     | M                      | Yes                                              |
| 3      | 7          | G    | 7pter      | 7pcen     | M                      | Yes                                              |
| 3      | 7          | U    | 65463418   | 7qter     | M                      | Yes                                              |
| 3      | 8          | L    | 8pter      | 20135643  | M                      | Yes                                              |
| 3      | 8          | L    | 23401471   | 40607130  | M                      | Yes                                              |
| 3      | 8          | G    | 1 75170824 | 8qter     | M                      | Yes                                              |
| 3      | 9          | U    | 9pter      | 9qter     | M                      | Yes                                              |
| 3      | 11         | L    | 11pter     | 12185692  | M                      | Yes                                              |

|   |    |   |           |           |   |     |
|---|----|---|-----------|-----------|---|-----|
| 3 | 11 | G | 51302895  | 11qter    | M | Yes |
| 3 | 17 | L | 17pter    | 39115918  | M | Yes |
| 3 | 17 | G | 61578821  | 17qter    | M | Yes |
| 4 | 3  | L | 3pter     | 3pcen     | W | Yes |
| 4 | 3  | G | 3qcen     | 3qter     | W | Yes |
| 4 | 9  | L | 9pter     | 9pcen     | W | Yes |
| 4 | 9  | G | 9qcen     | 9qter     | W | Yes |
| 4 | 13 | L | 13qcen    | 13qter    | W | Yes |
| 5 | 1  | G | 1qcen     | 1qter     | W | Yes |
| 5 | 3  | L | 3pter     | 84484209  | W | Yes |
| 5 | 3  | G | 84484209  | 3pcen     | W | Yes |
| 5 | 7  | G | 7pter     | 33959508  | W | Yes |
| 5 | 8  | L | 8pter     | 8pcen     | W | Yes |
| 5 | 8  | G | 50946254  | 8qter     | W | Yes |
| 5 | 9  | U | 9pter     | 9pcen     | W | Yes |
| 5 | 9  | G | 9qcen     | 9qter     | W | Yes |
| 5 | 18 | L | 18pter    | 12539850  | W | Yes |
| 6 | 3  | L | 3pter     | 3pcen     | W | Yes |
| 6 | 3  | G | 3qcen     | 3qter     | W | Yes |
| 6 | 8  | L | 8pter     | 8pcen     | W | Yes |
| 6 | 9  | L | 9pter     | 9pcen     | W | Yes |
| 7 | 2  | U | 172140552 | 2qter     | W | Yes |
| 7 | 7  | G | 7pter     | 7qter     | W | Yes |
| 7 | 8  | L | 8pter     | 40420045  | W | Yes |
| 7 | 13 | U | 13qcen    | 13qter    | W | Yes |
| 7 | 20 | G | 20pter    | 20qter    | W | Yes |
| 8 | 2  | L | 2pter     | 2qter     | M | Yes |
| 8 | 3  | L | 3pter     | 85729116  | M | Yes |
| 8 | 4  | L | 151884547 | 4qter     | M | Yes |
| 8 | 7  | U | 7pter     | 137550673 | M | Yes |
| 8 | 7  | L | 137550673 | 7qter     | M | Yes |
| 8 | 9  | L | 9pter     | 38288279  | M | Yes |
| 8 | 10 | L | 10pter    | 10qter    | M | Yes |
| 8 | 11 | L | 11pter    | 11pcen    | M | Yes |
| 8 | 13 | L | 13qcen    | 101353473 | M | Yes |
| 8 | 17 | L | 61578821  | 17qter    | M | Yes |

|    |    |   |             |           |   |     |
|----|----|---|-------------|-----------|---|-----|
| 8  | 18 | L | 24373058    | 18qter    | M | Yes |
| 9  | 1  | L | 1pter       | 1qter     | P | Yes |
| 9  | 2  | U | 2pter       | 2qter     | P | Yes |
| 9  | 6  | U | 6pter       | 6pcen     | P | Yes |
| 9  | 9  | U | 9pter       | 9qter     | P | Yes |
| 9  | 18 | U | 18pter      | 18qter    | P | Yes |
| 10 | 1  | G | 1qcen       | 1qter     | M | Yes |
| 10 | 3  | G | 142588260   | 3qter     | M | Yes |
| 10 | 7  | L | S 112928544 | 7qter     | M | Yes |
| 10 | 8  | L | 8pter       | 8pcen     | M | Yes |
| 10 | 8  | G | 8qcen       | 8qter     | M | Yes |
| 10 | 9  | L | 9pter       | 9pcen     | M | Yes |
| 10 | 11 | L | 11pter      | 11pcen    | M | Yes |
| 10 | 11 | G | 11qcen      | 90247865  | M | Yes |
| 10 | 11 | L | 94616661    | 11qter    | M | Yes |
| 10 | 15 | G | 15qcen      | 15qter    | M | Yes |
| 10 | 19 | L | 19pter      | 19pcen    | M | Yes |
| 11 | 2  | L | 2pter       | 2qter     | W | Yes |
| 11 | 3  | L | 3pter       | 48732295  | W | Yes |
| 11 | 9  | L | 9pter       | 99522797  | W | Yes |
| 11 | 13 | L | 13qcen      | 13qter    | W | Yes |
| 11 | 17 | L | 17qcen      | 17qter    | W | Yes |
| 11 | 19 | G | 6636304     | 19pcen    | W | Yes |
| 11 | 19 | G | 52822703    | 19qter    | W | Yes |
| 11 | X  | L | Xpter       | 50165985  | W | Yes |
| 12 | 2  | L | 128416303   | 139077715 | M | Yes |
| 12 | 2  | L | 157270746   | 157978388 | M | Yes |
| 12 | 8  | G | 8qcen       | 8qter     | M | Yes |
| 12 | 9  | L | 8546140     | 9383616   | M | Yes |
| 12 | 11 | U | 11pter      | 34999871  | M | Yes |
| 12 | 11 | G | 34999871    | 42397734  | M | Yes |
| 12 | 18 | L | 18pter      | 18qter    | M | Yes |
| 12 | X  | G | Xpter       | Xqter     | M | Yes |
| 13 | 2  | L | 207316788   | 2qter     | M | Yes |
| 13 | 3  | L | 3pter       | 100634082 | M | Yes |
| 13 | 3  | G | 100634082   | 3qter     | M | Yes |

|    |    |   |           |           |   |     |
|----|----|---|-----------|-----------|---|-----|
| 13 | 6  | L | 6pter     | 41551593  | M | Yes |
| 13 | 8  | L | 8pter     | 8pcen     | M | Yes |
| 13 | 8  | G | 8qcen     | 8qter     | M | Yes |
| 13 | 9  | L | 9pter     | 9pcen     | M | Yes |
| 13 | 16 | L | 16pter    | 16pcen    | M | Yes |
| 13 | 17 | U | 10484854  | 17350285  | M | Yes |
| 13 | 18 | L | 27086836  | 18qter    | M | Yes |
| 13 | 21 | G | 31842275  | 21qter    | M | Yes |
| 14 | 1  | U | 205702412 | 1qter     | M | Yes |
| 14 | 3  | L | 3pter     | 3pcen     | M | Yes |
| 14 | 5  | G | 5pter     | 5pcen     | M | Yes |
| 14 | 5  | U | 5qcen     | 5qter     | M | Yes |
| 14 | 6  | L | 6pter     | 17993381  | M | Yes |
| 14 | 9  | U | 9pter     | 38288618  | M | Yes |
| 14 | 10 | L | 10pter    | 10qter    | M | Yes |
| 14 | 13 | U | 13qcen    | 13qter    | M | Yes |
| 14 | 14 | U | 14qcen    | 14qter    | M | Yes |
| 14 | 17 | L | 17pter    | 17qter    | M | Yes |
| 14 | 20 | L | 20pter    | 20qter    | M | Yes |
| 14 | 22 | L | 23923658  | 22qter    | M | Yes |
| 15 | 1  | L | 69552025  | 117767684 | M | Yes |
| 15 | 2  | G | 157600114 | 2qter     | M | Yes |
| 15 | 4  | L | 152981522 | 4qter     | M | Yes |
| 15 | 6  | L | 6qcen     | 6qter     | M | Yes |
| 15 | 8  | L | 8pter     | 28758718  | M | Yes |
| 15 | 8  | G | 120251040 | 8qter     | M | Yes |
| 15 | 9  | L | 9pter     | 9pcen     | M | Yes |
| 15 | 10 | U | 57900628  | 10qter    | M | Yes |
| 15 | 11 | L | 11pter    | 36285306  | M | Yes |
| 15 | 13 | L | 13qcen    | 13qter    | M | Yes |
| 15 | 15 | G | 15qcen    | 15qter    | M | Yes |
| 15 | 19 | G | 19pter    | 19pcen    | M | Yes |
| 15 | 19 | U | 19qcen    | 19qter    | M | Yes |
| 15 | 20 | G | 20qcen    | 20qter    | M | Yes |
| 16 | 1  | G | 1pter     | 1qter     | M | Yes |
| 16 | 2  | G | 2pter     | 2pcen     | M | Yes |

|    |    |   |              |           |   |     |
|----|----|---|--------------|-----------|---|-----|
| 16 | 2  | L | 204135492    | 2qter     | M | Yes |
| 16 | 7  | G | 7pter        | 7pcen     | M | Yes |
| 16 | 7  | U | 136283723    | 7qter     | M | Yes |
| 16 | 8  | L | 8pter        | 65530781  | M | Yes |
| 16 | 9  | L | 9pter        | 31609334  | M | Yes |
| 16 | 9  | U | 9qcen        | 9qter     | M | Yes |
| 16 | 12 | G | 382 85807154 | 106197332 | M | Yes |
| 16 | 13 | L | 13qcen       | 13qter    | M | Yes |
| 16 | 14 | L | 14qcen       | 42414308  | M | Yes |
| 16 | 19 | G | 19pter       | 19pcen    | M | Yes |
| 16 | X  | G | Xpter        | Xqter     | M | Yes |
| 17 | 2  | L | 195419768    | 2qter     | W | No  |
| 17 | 3  | L | 3pter        | 3pcen     | W | No  |
| 17 | 3  | G | 3qcen        | 3qter     | W | No  |
| 17 | 4  | L | 147866330    | 4qter     | W | No  |
| 17 | 6  | L | 53871906     | 70927876  | W | No  |
| 17 | 6  | L | 99839825     | 105039815 | W | No  |
| 17 | 9  | U | 9pter        | 9qter     | W | No  |
| 17 | 16 | G | 16pter       | 16qter    | W | No  |
| 17 | 17 | G | 17pter       | 17qter    | W | No  |
| 17 | 20 | G | 20pter       | 59777498  | W | No  |
| 17 | 22 | G | 22qcen       | 35568466  | W | No  |
| 18 | 3  | L | 3pter        | 3pcen     | M | No  |
| 18 | 4  | L | 4pter        | 4qter     | M | No  |
| 18 | 9  | L | 9pter        | 32165439  | M | No  |
| 18 | 13 | L | 13qcen       | 55544030  | M | No  |
| 18 | 17 | L | 17pter       | 25779083  | M | No  |
| 18 | 17 | U | 25779083     | 17qter    | M | No  |
| 18 | 18 | L | 24168586     | 18qter    | M | No  |
| 19 | 3  | L | 3pter        | 3pcen     | M | No  |
| 19 | 3  | G | 3qcen        | 3qter     | M | No  |
| 19 | 6  | G | 6pter        | 6qter     | M | No  |
| 19 | 9  | L | 9pter        | 29639357  | M | No  |
| 19 | 9  | G | 29639357     | 39070062  | M | No  |
| 19 | 18 | L | 7593196      | 9630395   | M | No  |
| 19 | 19 | L | 19qcen       | 19qter    | M | No  |

|    |    |   |           |           |   |    |
|----|----|---|-----------|-----------|---|----|
| 19 | 21 | L | 21qcen    | 21qter    | M | No |
| 20 | 3  | L | 3pter     | 50483205  | M | No |
| 20 | 4  | L | 4pter     | 16067366  | M | No |
| 20 | 5  | G | 5pter     | 14081392  | M | No |
| 20 | 6  | U | 6pter     | 34527940  | M | No |
| 20 | 6  | L | 164735710 | 6qter     | M | No |
| 20 | 9  | G | 9pter     | 19095559  | M | No |
| 20 | 9  | G | 76723227  | 9qter     | M | No |
| 20 | 11 | L | 11pter    | 23226568  | M | No |
| 20 | 11 | G | 60683497  | 67553327  | M | No |
| 20 | 11 | L | 67553327  | 11qter    | M | No |
| 20 | 14 | G | 100674890 | 14qter    | M | No |
| 20 | 16 | G | 66782534  | 16qter    | M | No |
| 20 | 17 | L | 17pter    | 16962445  | M | No |
| 20 | 19 | L | 19pter    | 8306384   | M | No |
| 20 | 22 | U | 22qcen    | 22qter    | M | No |
| 21 | 1  | G | 1pter     | 118281080 | W | No |
| 21 | 3  | L | 58977975  | 3pcen     | W | No |
| 21 | 3  | G | 3qcen     | 3qter     | W | No |
| 21 | 5  | G | 5pter     | 37403696  | W | No |
| 21 | 7  | L | 7pter     | 5017436   | W | No |
| 21 | 9  | L | 8980778   | 9873921   | W | No |
| 21 | 11 | L | 11pter    | 11pcen    | W | No |
| 21 | 13 | L | 13qcen    | 71374078  | W | No |
| 21 | 17 | L | 17pter    | 17qter    | W | No |
| 21 | 20 | G | 20pter    | 20qter    | W | No |
| 22 | 1  | G | 1pter     | 86321294  | M | No |
| 22 | 3  | G | 3pter     | 3qter     | M | No |
| 22 | 5  | L | 5pter     | 5qter     | M | No |
| 22 | 6  | G | 6pter     | 6qter     | M | No |
| 22 | 8  | L | 8pter     | 8qter     | M | No |
| 22 | 10 | L | 10pter    | 10qter    | M | No |
| 22 | 17 | L | 17pter    | 17qter    | M | No |
| 22 | 18 | G | 18pter    | 18qter    | M | No |
| 22 | 22 | U | 22qcen    | 22qter    | M | No |
| 23 | 5  | G | 5pter     | 5pcen     | M | No |

|    |    |   |           |           |   |    |
|----|----|---|-----------|-----------|---|----|
| 23 | 5  | U | 77667673  | 5qter     | M | No |
| 23 | 9  | L | 9pter     | 9pcen     | M | No |
| 23 | 10 | U | 78414705  | 10qter    | M | No |
| 23 | 19 | L | 19pter    | 16457507  | M | No |
| 23 | 20 | G | 20pter    | 20qter    | M | No |
| 23 | 22 | G | 22qcen    | 22qter    | M | No |
| 24 | 1  | U | 1qcen     | 1qter     | M | No |
| 24 | 6  | L | 100047824 | 128335774 | M | No |
| 24 | 6  | U | 128335774 | 6qter     | M | No |
| 24 | 8  | L | 8pter     | 33098684  | M | No |
| 24 | 8  | G | 33098684  | 40394630  | M | No |
| 24 | 8  | L | 40394630  | 8pcen     | M | No |
| 24 | 8  | G | 8qcen     | 8qter     | M | No |
| 24 | 9  | L | 9pter     | 9pcen     | M | No |
| 24 | 9  | G | 9qcen     | 9qter     | M | No |
| 24 | 18 | G | 18pter    | 43984973  | M | No |
| 24 | 18 | L | 43984973  | 18qter    | M | No |
| 24 | 19 | L | 19pter    | 19qter    | M | No |
| 24 | 20 | G | 20pter    | 20qter    | M | No |
| 24 | 21 | L | 21qcen    | 21qter    | M | No |
| 24 | 22 | L | 22qcen    | 22qter    | M | No |
| 25 | 3  | L | 3pter     | 3pcen     | W | No |
| 25 | 3  | G | 3qcen     | 3qter     | W | No |
| 25 | 8  | L | 8pter     | 8pcen     | W | No |
| 25 | 8  | G | 8qcen     | 8qter     | W | No |
| 25 | 9  | G | 9pter     | 9224067   | W | No |
| 25 | 9  | L | 9224067   | 9826019   | W | No |
| 25 | 9  | G | 9826019   | 9qter     | W | No |
| 25 | 11 | L | 78185207  | 103865285 | W | No |
| 25 | 13 | U | 13qcen    | 13qter    | W | No |
| 25 | 16 | L | 16qcen    | 63216477  | W | No |
| 25 | 18 | L | 18qcen    | 18qter    | W | No |
| 25 | 21 | L | 15134119  | 34094600  | W | No |
| 26 | 1  | G | 1qcen     | 1qter     | P | No |
| 26 | 3  | L | 3pter     | 3pcen     | P | No |
| 26 | 5  | G | 5pter     | 29482913  | P | No |

|    |    |   |           |           |   |    |
|----|----|---|-----------|-----------|---|----|
| 26 | 7  | G | 7pter     | 7pcen     | P | No |
| 26 | 7  | U | 67349417  | 7qter     | P | No |
| 26 | 8  | L | 8pter     | 8pcen     | P | No |
| 26 | 8  | G | 8qcen     | 8qter     | P | No |
| 26 | 9  | U | 9pter     | 8757084   | P | No |
| 26 | 9  | L | 8757084   | 72582743  | P | No |
| 26 | 9  | U | 72582743  | 9qter     | P | No |
| 26 | 11 | L | 11pter    | 33478780  | P | No |
| 26 | 11 | G | 33478780  | 46289568  | P | No |
| 26 | 13 | U | 13qcen    | 13qter    | P | No |
| 26 | 17 | U | 17pter    | 17pcen    | P | No |
| 27 | 3  | L | 3pter     | 3pcen     | W | No |
| 27 | 14 | L | 14qcen    | 14qter    | W | No |
| 28 | 3  | U | 3pter     | 18688495  | W | No |
| 28 | 3  | L | 18688495  | 3pcen     | W | No |
| 28 | 3  | G | 104364317 | 3qter     | W | No |
| 28 | 16 | L | 15560980  | 16pcen    | W | No |
| 28 | 17 | U | 17pter    | 17pcen    | W | No |
| 29 | 2  | L | 133334820 | 2qter     | M | No |
| 29 | 6  | G | 6pter     | 39935930  | M | No |
| 29 | 6  | L | 134991763 | 6qter     | M | No |
| 29 | 8  | G | 85771857  | 8qter     | M | No |
| 29 | 9  | U | 9pter     | 9pcen     | M | No |
| 29 | 9  | G | 9qcen     | 9qter     | M | No |
| 29 | 16 | L | 16pter    | 16qter    | M | No |
| 29 | 17 | L | 17pter    | 17qter    | M | No |
| 29 | 19 | L | 19pter    | 19qter    | M | No |
| 29 | X  | G | Xpter     | Xqter     | M | No |
| 30 | 3  | L | 35435327  | 3pcen     | W | No |
| 30 | 4  | L | 180344968 | 182597652 | W | No |
| 30 | 9  | L | 9pter     | 9qter     | W | No |
| 31 | 4  | G | 23751758  | 4qter     | P | No |
| 31 | 5  | L | 58745804  | 95489433  | P | No |
| 31 | 5  | G | 98349716  | 111551020 | P | No |
| 31 | 6  | G | 6qcen     | 6qter     | P | No |
| 31 | 8  | L | 8pter     | 35767933  | P | No |



|    |    |   |           |           |   |    |
|----|----|---|-----------|-----------|---|----|
| 31 | 11 | L | 71806079  | 99776100  | P | No |
| 31 | 11 | G | 99776100  | 110407980 | P | No |
| 31 | 11 | L | 110407980 | 11qter    | P | No |
| 31 | 12 | G | 12pter    | 92489354  | P | No |
| 31 | 12 | L | 92489354  | 12qter    | P | No |
| 31 | 13 | G | 13qcen    | 13qter    | P | No |
| 31 | 17 | U | 17pter    | 17pcen    | P | No |
| 31 | X  | G | Xpter     | Xqter     | P | No |
| 32 | 3  | L | 3pter     | 3pcen     | M | No |
| 32 | 3  | G | 3qcen     | 3qter     | M | No |
| 32 | 6  | G | 6pter     | 6qter     | M | No |
| 32 | 8  | L | 8pter     | 33810484  | M | No |
| 32 | 8  | G | 33810484  | 38081281  | M | No |
| 32 | 8  | L | 38081281  | 8pcen     | M | No |
| 32 | 9  | L | 9pter     | 9pcen     | M | No |
| 32 | 11 | G | 67389760  | 70170405  | M | No |
| 32 | 11 | L | 70170405  | 11qter    | M | No |
| 32 | 12 | L | 12pter    | 12pcen    | M | No |
| 32 | 12 | G | 12qcen    | 74225226  | M | No |
| 32 | 12 | L | 74225226  | 91131188  | M | No |
| 32 | 13 | L | 13qcen    | 13qter    | M | No |
| 32 | 14 | G | 14qcen    | 14qter    | M | No |
| 32 | 15 | L | 15qcen    | 54075596  | M | No |
| 32 | 15 | G | 54075596  | 15qter    | M | No |
| 32 | 18 | G | 18qcen    | 19445989  | M | No |
| 32 | 18 | L | 19445989  | 18qter    | M | No |
| 32 | 22 | G | 22qcen    | 22qter    | M | No |
| 33 | 1  | G | 1qcen     | 1qter     | W | No |
| 33 | 3  | L | 14076772  | 3pcen     | W | No |
| 33 | 3  | G | 3qcen     | 3qter     | W | No |
| 33 | 5  | L | 62486173  | 5qter     | W | No |
| 33 | 8  | L | 8pter     | 29183786  | W | No |
| 33 | 8  | G | 29183786  | 8qter     | W | No |
| 33 | 9  | L | 9pter     | 9pcen     | W | No |
| 33 | 22 | G | 22qcen    | 22qter    | W | No |
| 34 | 1  | G | 1pter     | 55646227  | M | No |

|    |    |   |           |           |   |    |
|----|----|---|-----------|-----------|---|----|
| 34 | 1  | G | 107081387 | 154907063 | M | No |
| 34 | 1  | L | 154907063 | 1qter     | M | No |
| 34 | 2  | L | 138618113 | 172607629 | M | No |
| 34 | 3  | L | 13105960  | 3pcen     | M | No |
| 34 | 5  | L | 77007608  | 130032846 | M | No |
| 34 | 13 | L | 13qcen    | 13qter    | M | No |
| 34 | 16 | L | 16pter    | 16qter    | M | No |
| 34 | 19 | G | 19pter    | 19717956  | M | No |
| 34 | 19 | G | 34855756  | 19qter    | M | No |
| 35 | 1  | G | 1pter     | 46622515  | M | No |
| 35 | 1  | G | 233714150 | 1qter     | M | No |
| 35 | 3  | L | 3pter     | 3pcen     | M | No |
| 35 | 3  | G | 3qcen     | 3qter     | M | No |
| 35 | 4  | G | 176148064 | 177311526 | M | No |
| 35 | 4  | L | 177311526 | 4qter     | M | No |
| 35 | 5  | G | 5pter     | 5pcen     | M | No |
| 35 | 5  | L | 5qcen     | 5qter     | M | No |
| 35 | 7  | G | 7pter     | 7pcen     | M | No |
| 35 | 8  | L | 8pter     | 3366328   | M | No |
| 35 | 8  | G | 3366328   | 4185504   | M | No |
| 35 | 9  | L | 9pter     | 9pcen     | M | No |
| 35 | 11 | L | 11pter    | 43836058  | M | No |
| 35 | 11 | G | 43836058  | 47598107  | M | No |
| 35 | 11 | L | 47598107  | 11pcen    | M | No |
| 35 | 11 | G | 11qcen    | 11qter    | M | No |
| 35 | 13 | L | 20690152  | 59432112  | M | No |
| 35 | 17 | L | 17pter    | 19358271  | M | No |
| 35 | 18 | L | 58800964  | 18qter    | M | No |
| 36 | 3  | L | 3pter     | 3pcen     | W | No |
| 36 | 3  | G | 3qcen     | 3qter     | W | No |
| 36 | 5  | G | 5pter     | 14741457  | W | No |
| 36 | 8  | L | 8pter     | 8pcen     | W | No |
| 36 | 8  | G | 8qcen     | 8qter     | W | No |
| 36 | 9  | L | 9pter     | 9pcen     | W | No |
| 36 | 9  | G | 9qcen     | 9qter     | W | No |
| 36 | 18 | G | 4815198   | 21205388  | W | No |

|    |    |   |           |           |   |    |
|----|----|---|-----------|-----------|---|----|
| 37 | 1  | L | 107081387 | 115202728 | M | No |
| 37 | 2  | L | 2pter     | 2pcen     | M | No |
| 37 | 2  | L | 123248941 | 2qter     | M | No |
| 37 | 3  | G | 3pter     | 49511403  | M | No |
| 37 | 3  | L | 49511403  | 3pcen     | M | No |
| 37 | 4  | L | 4pter     | 4pcen     | M | No |
| 37 | 4  | L | 79813456  | 4qter     | M | No |
| 37 | 8  | L | 8pter     | 8pcen     | M | No |
| 37 | 8  | L | 99296050  | 120116189 | M | No |
| 37 | 8  | G | 120116189 | 132750633 | M | No |
| 37 | 8  | L | 132572683 | 135953731 | M | No |
| 37 | 9  | L | 9pter     | 9pcen     | M | No |
| 37 | 9  | G | 9qcen     | 78669063  | M | No |
| 37 | 9  | L | 79863604  | 84641768  | M | No |
| 37 | 9  | L | 117406323 | 132594059 | M | No |
| 37 | 9  | G | 132594059 | 9qter     | M | No |
| 37 | 10 | L | 85967899  | 10qter    | M | No |
| 37 | 11 | L | 11pter    | 11qter    | M | No |
| 37 | 12 | L | 12qcen    | 50073851  | M | No |
| 37 | 13 | L | 13qcen    | 13qter    | M | No |
| 37 | 14 | G | 89028694  | 98086846  | M | No |
| 37 | 14 | L | 98086846  | 14qter    | M | No |
| 37 | 15 | L | 15qcen    | 42235116  | M | No |
| 37 | 16 | L | 16pter    | 16qter    | M | No |
| 37 | 17 | L | 17pter    | 38716540  | M | No |
| 37 | 20 | G | 20pter    | 20pcen    | M | No |
| 37 | 20 | L | 51726146  | 20qter    | M | No |
| 37 | 22 | L | 21581316  | 22qter    | M | No |
| 38 | 3  | L | 3pter     | 3pcen     | W | No |
| 38 | 3  | G | 3qcen     | 3qter     | W | No |
| 38 | 4  | G | 4pter     | 4qter     | W | No |
| 38 | 20 | G | 20pter    | 20qter    | W | No |
| 39 | 4  | L | 4pter     | 42582690  | M | No |
| 39 | 5  | G | 5pter     | 5qter     | M | No |
| 39 | 8  | L | 8pter     | 8pcen     | M | No |
| 39 | 8  | G | 8qcen     | 8qter     | M | No |

|    |    |   |           |           |   |    |
|----|----|---|-----------|-----------|---|----|
| 39 | 9  | L | 9pter     | 9pcen     | M | No |
| 39 | 9  | G | 71160519  | 74744142  | M | No |
| 39 | 9  | G | 89078635  | 89761230  | M | No |
| 39 | 9  | G | 108020643 | 109727130 | M | No |
| 39 | 9  | G | 112628159 | 117235674 | M | No |
| 39 | 9  | G | 121501892 | 125085516 | M | No |
| 39 | 10 | L | 10pter    | 15645500  | M | No |
| 39 | 11 | G | 11qcen    | 11qter    | M | No |
| 39 | 15 | G | 15qcen    | 21239625  | M | No |
| 39 | 15 | G | 51023926  | 53709395  | M | No |
| 39 | 15 | G | 56028665  | 56761065  | M | No |
| 39 | 15 | G | 83005429  | 92770773  | M | No |
| 39 | X  | L | Xpter     | 2638435   | M | No |
| 40 | 1  | G | 1pter     | 50232000  | P | No |
| 40 | 1  | G | 1qcen     | 1qter     | P | No |
| 40 | 2  | G | 22758199  | 26304931  | P | No |
| 40 | 2  | G | 31920590  | 34285078  | P | No |
| 40 | 2  | G | 36649566  | 39605176  | P | No |
| 40 | 2  | L | 47585323  | 63841179  | P | No |
| 40 | 2  | G | 68570155  | 75368058  | P | No |
| 40 | 2  | G | 83939327  | 88372742  | P | No |
| 40 | 2  | L | 2qcen     | 105515281 | P | No |
| 40 | 2  | L | 122362258 | 127091234 | P | No |
| 40 | 2  | L | 158125140 | 170834263 | P | No |
| 40 | 2  | G | 172016507 | 178814410 | P | No |
| 40 | 2  | L | 178814410 | 2qter     | P | No |
| 40 | 3  | L | 3pter     | 3pcen     | P | No |
| 40 | 3  | G | 3qcen     | 3qter     | P | No |
| 40 | 8  | G | 8pter     | 8qter     | P | No |
| 40 | 9  | G | 9pter     | 9044383   | P | No |
| 40 | 9  | L | 9044383   | 10238924  | P | No |
| 40 | 9  | G | 10238924  | 9qter     | P | No |
| 40 | 10 | L | 10pter    | 10qter    | P | No |
| 40 | 11 | L | 11pter    | 11qter    | P | No |
| 40 | 14 | G | 21221957  | 22774783  | P | No |
| 40 | 14 | L | 22774783  | 14qter    | P | No |

|    |    |   |           |           |   |    |
|----|----|---|-----------|-----------|---|----|
| 40 | 15 | L | 15qcen    | 15qter    | P | No |
| 40 | 16 | G | 16pter    | 4970869   | P | No |
| 40 | 19 | G | 19pter    | 19qter    | P | No |
| 40 | 21 | L | 21qcen    | 27012975  | P | No |
| 40 | X  | L | Xpter     | 2638435   | P | No |
| 40 | X  | G | 2638435   | Xqter     | P | No |
| 41 | 3  | G | 3qcen     | 3qter     | W | No |
| 41 | 4  | L | 72134611  | 4qter     | W | No |
| 41 | 7  | G | 7qcen     | 76705725  | W | No |
| 41 | 8  | L | 8pter     | 8pcen     | W | No |
| 41 | 9  | L | 9pter     | 9pcen     | W | No |
| 41 | 9  | G | 9qcen     | 9qter     | W | No |
| 41 | X  | G | 109306542 | Xqter     | W | No |
| 42 | 3  | L | 3pter     | 3pcen     | W | No |
| 42 | 5  | G | 5pter     | 5pcen     | W | No |
| 42 | 5  | L | 5qcen     | 5qter     | W | No |
| 42 | 7  | L | 149160754 | 153604662 | W | No |
| 42 | 9  | L | 9pter     | 9pcen     | W | No |
| 42 | 9  | G | 9qcen     | 9qter     | W | No |
| 42 | 12 | L | 9499542   | 24473394  | W | No |
| 42 | 12 | L | 25439449  | 31235779  | W | No |
| 42 | 13 | L | 13qcen    | 13qter    | W | No |
| 42 | 14 | L | 14qcen    | 14qter    | W | No |
| 42 | 22 | G | 22qcen    | 22qter    | W | No |
| 43 | 3  | L | 3pter     | 3pcen     | P | No |
| 43 | 5  | L | 5qcen     | 5qter     | P | No |
| 43 | 6  | G | 63203891  | 65490873  | P | No |
| 43 | 6  | L | 65490873  | 93350483  | P | No |
| 43 | 8  | L | 8pter     | 8pcen     | P | No |
| 43 | 8  | G | 100897599 | 8qter     | P | No |
| 43 | 9  | L | 9pter     | 101194694 | P | No |
| 43 | 11 | L | 11pter    | 59702093  | P | No |
| 43 | 11 | G | 59702093  | 72133214  | P | No |
| 43 | 11 | L | 72133214  | 77530937  | P | No |
| 43 | 11 | G | 77530937  | 78512341  | P | No |
| 43 | 11 | L | 78512341  | 11qter    | P | No |

|    |    |   |           |          |   |    |
|----|----|---|-----------|----------|---|----|
| 43 | 13 | L | 21245592  | 13qter   | P | No |
| 43 | 17 | L | 33349891  | 17qter   | P | No |
| 43 | 19 | L | 19pter    | 11954982 | P | No |
| 43 | 19 | G | 11954982  | 19pcen   | P | No |
| 43 | 22 | G | 22qcen    | 22qter   | P | No |
| 43 | X  | G | 93664399  | Xqter    | P | No |
| 44 | 3  | L | 3pter     | 80820084 | P | No |
| 44 | 3  | G | 84217925  | 84946034 | P | No |
| 44 | 3  | L | 84946034  | 3pcen    | P | No |
| 44 | 3  | G | 3qcen     | 3qter    | P | No |
| 44 | 5  | G | 5pter     | 5pcen    | P | No |
| 44 | 5  | L | 5qcen     | 5qter    | P | No |
| 44 | 9  | L | 9pter     | 9pcen    | P | No |
| 44 | 10 | L | 10pter    | 10pcen   | P | No |
| 44 | 10 | L | 43972087  | 10qter   | P | No |
| 44 | 13 | L | 13qcen    | 13qter   | P | No |
| 44 | X  | G | Xpter     | Xqter    | P | No |
| 45 | 3  | L | 3pter     | 3pcen    | W | No |
| 45 | 3  | G | 3qcen     | 3qter    | W | No |
| 45 | 9  | L | 9pter     | 32423259 | W | No |
| 45 | 9  | G | 9qcen     | 9qter    | W | No |
| 45 | 10 | L | 5105374   | 10pcen   | W | No |
| 45 | 14 | G | 21480761  | 22127772 | W | No |
| 45 | 15 | G | 38206911  | 15qter   | W | No |
| 45 | 19 | L | 19qcen    | 56902604 | W | No |
| 45 | 22 | G | 22qcen    | 22qter   | W | No |
| 46 | 3  | L | 3pter     | 52666541 | W | No |
| 46 | 4  | L | 4pter     | 4pcen    | W | No |
| 46 | 7  | U | 151865741 | 7qter    | W | No |
| 46 | 8  | G | 96626801  | 8qter    | W | No |
| 46 | 9  | L | 9556330   | 30034176 | W | No |
| 46 | 9  | G | 9qcen     | 9qter    | W | No |
| 46 | 14 | L | 14qcen    | 33515163 | W | No |
| 47 | 5  | G | 5pter     | 5pcen    | W | No |
| 47 | 5  | L | 5qcen     | 5qter    | W | No |
| 47 | 9  | U | 9qcen     | 9qter    | W | No |

|    |    |   |           |           |   |    |
|----|----|---|-----------|-----------|---|----|
| 48 | 1  | L | 1pter     | 1pcen     | M | No |
| 48 | 3  | L | 3pter     | 88586578  | M | No |
| 48 | 3  | G | 88586578  | 3qter     | M | No |
| 48 | 4  | L | 4pter     | 24898076  | M | No |
| 48 | 4  | G | 24898076  | 4pcen     | M | No |
| 48 | 4  | L | 4qcen     | 70505765  | M | No |
| 48 | 4  | G | 70505765  | 77719226  | M | No |
| 48 | 4  | L | 77719226  | 84467302  | M | No |
| 48 | 4  | G | 84467302  | 87259610  | M | No |
| 48 | 4  | L | 87259610  | 4qter     | M | No |
| 48 | 5  | L | 5pter     | 5qter     | M | No |
| 48 | 7  | G | 7pter     | 66465414  | M | No |
| 48 | 7  | L | 66465414  | 97572773  | M | No |
| 48 | 8  | L | 8pter     | 37013582  | M | No |
| 48 | 8  | G | 37013582  | 8pcen     | M | No |
| 48 | 9  | L | 9pter     | 102047938 | M | No |
| 48 | 9  | G | 102047938 | 9qter     | M | No |
| 48 | 10 | L | 10pter    | 10qter    | M | No |
| 48 | 11 | L | 11pter    | 11pcen    | M | No |
| 48 | 13 | L | 13qcen    | 13qter    | M | No |
| 48 | 18 | G | 1018600   | 2129800   | M | No |
| 48 | 18 | L | 2129800   | 12408393  | M | No |
| 48 | 18 | G | 12408393  | 13982592  | M | No |
| 48 | 18 | L | 28242983  | 18qter    | M | No |
| 48 | 20 | L | 20pter    | 6228406   | M | No |
| 48 | 21 | L | 21qcen    | 21qter    | M | No |
| 48 | 22 | G | 22qcen    | 22qter    | M | No |
| 49 | 1  | L | 73693652  | 1pcen     | W | No |
| 49 | 7  | G | 7pter     | 7qter     | W | No |
| 50 | 3  | L | 3pter     | 3pcen     | W | No |
| 50 | 4  | L | 4pter     | 4pcen     | W | No |
| 50 | 9  | L | 9pter     | 99829504  | W | No |
| 50 | 9  | G | 99829504  | 101194694 | W | No |
| 50 | 9  | L | 101194694 | 9qter     | W | No |
| 50 | 11 | G | 58229987  | 102393178 | W | No |
| 50 | 11 | L | 102393178 | 11qter    | W | No |

|    |    |   |           |           |   |    |
|----|----|---|-----------|-----------|---|----|
| 50 | 14 | U | 14qcen    | 14qter    | W | No |
| 50 | 17 | U | 17pter    | 16004115  | W | No |
| 50 | 19 | L | 19qcen    | 19qter    | W | No |
| 51 | 1  | G | 1pter     | 55044646  | W | No |
| 51 | 3  | L | 3pter     | 3pcen     | W | No |
| 51 | 3  | G | 3qcen     | 3qter     | W | No |
| 51 | 6  | G | 6pter     | 44700120  | W | No |
| 51 | 9  | L | 17576820  | 33276502  | W | No |
| 51 | 19 | G | 19pter    | 19qter    | W | No |
| 51 | 22 | G | 22qcen    | 22qter    | W | No |
| 52 | 1  | G | 1pter     | 1qter     | P | No |
| 52 | 2  | G | 2qcen     | 2qter     | P | No |
| 52 | 3  | L | 3pter     | 3pcen     | P | No |
| 52 | 3  | G | 3qcen     | 3qter     | P | No |
| 52 | 5  | G | 5pter     | 5pcen     | P | No |
| 52 | 5  | G | 107590629 | 149394758 | P | No |
| 52 | 7  | G | 7pter     | 7qter     | P | No |
| 52 | 8  | L | 48936226  | 50181875  | P | No |
| 52 | 8  | L | 54808573  | 56054222  | P | No |
| 52 | 8  | L | 128301885 | 130793184 | P | No |
| 52 | 9  | G | 9pter     | 9qter     | P | No |
| 52 | 10 | L | 10pter    | 102601534 | P | No |
| 52 | 10 | G | 102601534 | 10qter    | P | No |
| 52 | 13 | G | 13qcen    | 20551292  | P | No |
| 52 | 13 | L | 20551292  | 113032099 | P | No |
| 52 | 13 | G | 113032099 | 13qter    | P | No |
| 52 | 14 | G | 14qcen    | 14qter    | P | No |
| 52 | 15 | L | 15qcen    | 43699917  | P | No |
| 52 | 15 | G | 43699917  | 15qter    | P | No |
| 52 | 16 | G | 16pter    | 16qter    | P | No |
| 52 | 17 | L | 17pter    | 17qter    | P | No |
| 52 | 19 | G | 19pter    | 19qter    | P | No |
| 52 | 20 | G | 20pter    | 20qter    | P | No |
| 52 | 21 | G | 21qcen    | 21qter    | P | No |
| 52 | 22 | G | 22qcen    | 22qter    | P | No |
| 53 | 3  | L | 3pter     | 3pcen     | W | No |



|    |    |   |           |           |   |    |
|----|----|---|-----------|-----------|---|----|
| 53 | 4  | L | 58405766  | 4qter     | W | No |
| 53 | 5  | L | 81848086  | 5qter     | W | No |
| 53 | 9  | L | 9pter     | 32423259  | W | No |
| 53 | 9  | G | 32423259  | 36348179  | W | No |
| 53 | 17 | L | 17pter    | 17qter    | W | No |
| 54 | 9  | U | 9pter     | 9pcen     | W | No |
| 54 | 9  | U | 116382431 | 121501892 | W | No |
| 55 | 5  | G | 5pter     | 5qter     | W | No |
| 55 | 9  | L | 9pter     | 9pcen     | W | No |
| 56 | 4  | G | 4pter     | 53984612  | W | No |
| 56 | 4  | L | 53984612  | 4qter     | W | No |
| 56 | 9  | L | 9pter     | 9pcen     | W | No |
| 56 | 14 | L | 14qcen    | 14qter    | W | No |
| 56 | 22 | G | 22qcen    | 22qter    | W | No |
| 57 | 1  | G | 1pter     | 1qter     | P | No |
| 57 | 2  | L | 2pter     | 2qter     | P | No |
| 57 | 3  | L | 3pter     | 84460628  | P | No |
| 57 | 3  | G | 84460628  | 3qter     | P | No |
| 57 | 4  | L | 4pter     | 4qter     | P | No |
| 57 | 5  | G | 5pter     | 5060501   | P | No |
| 57 | 6  | G | 6pter     | 64659243  | P | No |
| 57 | 6  | L | 64659243  | 6qter     | P | No |
| 57 | 8  | G | 8pter     | 8qter     | P | No |
| 57 | 9  | G | 9pter     | 9qter     | P | No |
| 57 | 10 | L | 10pter    | 10qter    | P | No |
| 57 | 11 | L | 11pter    | 11qter    | P | No |
| 57 | 12 | L | 12pter    | 12qter    | P | No |
| 57 | 13 | L | 13qcen    | 13qter    | P | No |
| 57 | 14 | G | 14qcen    | 14qter    | P | No |
| 57 | 15 | L | 15qcen    | 15qter    | P | No |
| 57 | 16 | L | 16pter    | 16qter    | P | No |
| 57 | 17 | L | 17pter    | 17qter    | P | No |
| 57 | 18 | L | 18pter    | 18qter    | P | No |
| 57 | 19 | G | 19pter    | 19qter    | P | No |
| 57 | 20 | L | 20pter    | 20qter    | P | No |
| 57 | 22 | L | 22qcen    | 22qter    | P | No |

|    |    |   |           |           |   |    |
|----|----|---|-----------|-----------|---|----|
| 57 | X  | L | Xpter     | Xqter     | P | No |
| 58 | 3  | L | 3pter     | 3pcen     | W | No |
| 58 | 5  | G | 5pter     | 5pcen     | W | No |
| 58 | 5  | L | 5qcen     | 5qter     | W | No |
| 58 | 13 | L | 13qcen    | 57071490  | W | No |
| 58 | 13 | G | 106366816 | 13qter    | W | No |
| 58 | 19 | L | 19qcen    | 19qter    | W | No |
| 59 | 5  | L | 5pter     | 5qter     | P | No |
| 59 | 8  | L | 8pter     | 146274826 | P | No |
| 59 | 11 | G | 62809873  | 71151810  | P | No |
| 59 | 21 | G | 21qcen    | 21qter    | P | No |
| 59 | 22 | G | 22qcen    | 22qter    | P | No |
| 60 | 4  | L | 62035992  | 62798894  | W | No |
| 60 | 4  | L | 78184610  | 100755762 | W | No |
| 60 | 7  | G | 7qcen     | 7qter     | W | No |
| 60 | 9  | U | 9pter     | 9pcen     | W | No |
| 60 | 9  | G | 9qcen     | 9qter     | W | No |
| 60 | 14 | L | 22515979  | 24457011  | W | No |
| 60 | 22 | L | 20251375  | 22qter    | W | No |
